# Supplementary material for: Self-assembled SnO2/COF catalysts for improved electro-synthesis of hydrogen peroxide
Source: Royal Society of Chemistry journal article supplement (doi:10.1039/d4ta08190k), 2025-01-01
Supplement: d4ta08190k1.pdf [file d4ta08190k1.pdf]

## Electronic Supplementary Information (ESI)

### Self-assembly SnO<sub>2</sub>/COF catalysts for improved electro-synthesis of hydrogen peroxide

Guoliang Wang<sup>[a]</sup>, Zhikang Bao<sup>[b]</sup>, Yuanan Li<sup>[a]</sup>, Yabing Wang<sup>[a]</sup>, Xuejiao Cui<sup>[a]</sup>,  
Haochong Zhong<sup>[a]</sup>, Wenjuan Fang<sup>\*[a]</sup>, and Jianguo Wang<sup>\*[a]</sup>

[a] Institute of Industrial Catalysis, State Key Laboratory Breeding Base of Green-Chemical Synthesis Technology, Zhejiang University of Technology.

Hangzhou 310032, China

[b] College of Chemical and Material Engineering, Quzhou University.

Quzhou 324000, China

\*Correspondence and requests for materials should be addressed to J.G.W. (email:

jgw@zjut.edu.cn).

## 1. Experimental Procedures

### 1.1. Chemicals and materials

1,3,5-Triformylphloroglucinol (Tp, 99.5%, Aladdin), p-phenylenediamine (Pa, 99%, Macklin), acetic acid (99.5%, Aladdin), Tin Tetrachloride ( $\text{SnCl}_4 \cdot 5\text{H}_2\text{O}$ , 99%, Aladdin), Potassium hydroxide (KOH, Macklin, 99.5%), Hydrochloric acid (HCl, Lingfeng Chemical Reagent Co., Ltd, 36%), Sulfuric acid ( $\text{H}_2\text{SO}_4$ , Lingfeng Chemical Reagent Co., Ltd, 99.9%), Ammonia ( $\text{NH}_3 \cdot \text{H}_2\text{O}$ , Lingfeng Chemical Reagent Co., Ltd, 28%), Dichloromethane ( $\text{CH}_2\text{Cl}_2$ , AR, China National Medicines Co., Ltd), Trichloromethane ( $\text{CHCl}_3$ , AR, China National Medicines Co., Ltd), Potassium titanyle oxalate ( $\text{C}_4\text{K}_2\text{O}_9\text{Ti} \cdot 2\text{H}_2\text{O}$ , Macklin, 99%), Potassium ferricyanide ( $\text{K}_3\text{FeC}_6\text{N}_6$ , Macklin,  $\geq 99.5\%$ ), Nafion (DuPont), Ethanol ( $\text{CH}_3\text{CH}_2\text{OH}$ , Sinopharm Chemical Reagent Co., Ltd, 99.5%), Deionized water (DI, Millipore  $18.2 \text{ M}\Omega \text{ cm}^{-1}$ ), hydrogen peroxide ( $\text{H}_2\text{O}_2$ , Alfa Aesar, 35% w/w),  $\text{O}_2$  (99.99%) and  $\text{N}_2$  (99.99%) were purchased from Hangzhou Jingong Special Gas Co., Ltd. All reagents are used directly without further purification.

### 1.2. Synthesis of $\text{SnO}_2$ nanoparticles

$\text{SnO}_2$  was synthesized by a hydrothermal method. Typically, an appropriate amount of  $\text{SnCl}_4 \cdot 5\text{H}_2\text{O}$  was dissolved into deionized water to fabricate solution A. Ammonia was added into solution A under continuous stirring until the pH of the solution was 9. The obtained dispersion was transferred to a Teflon and treated at  $120 \text{ }^\circ\text{C}$  for 12 h before filtration and rinsing with water and ethanol to collect white precipitation (solid B). This solid was washed by deionized water three times and treated by freeze-dried. The resulting white powders were denoted as  $\text{SnO}_2$  nanoparticles.<sup>1</sup>

### 1.3. Synthesis of COF

Tp (200 mg, 0.9517 mmol), Pa (200 mg, 1.849 mmol) and 3 mL acetic acid were dissolved in 150 mL  $\text{CH}_2\text{Cl}_2$  and 50 mL  $\text{CHCl}_3$ , and the mixture was aging at room temperature for 48 h. The products were harvested by centrifugation and washed with  $\text{CH}_2\text{Cl}_2$  for twice.<sup>2</sup>

### 1.4. Synthesis of m- $\text{SnO}_2$ /COF

Take 10%SnO<sub>2</sub>/COF as an example. After weighing 200 mg of COF, 20 mg of SnO<sub>2</sub> was accurately weighed. Transferring the powder to a mortar, adding a little ethanol (adjust pH to 2 with 1 M hydrochloric acid) for better contact, then powder was ground for about twenty minutes until all the ethanol has evaporated, powder left in the mortar was named 10%SnO<sub>2</sub>/COF.

## **2. Materials characterization**

The morphology of the samples was observed by emission scanning electron microscope (FE-SEM) (HITACHI Regulus 8100) at 15 kV acceleration voltage. In order to further observe the submicro-structure of the catalyst, the distribution of related elements was analyzed by 300 kV transmission electron microscope (TEM, Tecnai G2 F30 S-Twin) and energy dispersive spectrometer (EDS, Xplore 80). X-ray diffraction (XRD) was performed on A PANalytical X-pert Pro X-ray diffractometer under the irradiation of CuK $\alpha$  ( $\lambda = 1.5418 \text{ \AA}$ ) at 40 kV and 40 mA. X-ray photoelectron spectroscopy (XPS) was tested using the Thermo Scientific K-Alpha photoelectron spectrometer. N<sub>2</sub> adsorption/desorption isotherms were measured at -196 °C using the Micromeritics ASAP 2020 system. The UV-visible light absorption spectrum was recorded by Mapada P4. IS50 Fourier transform infrared spectroscopy was performed using KBr particle method (FTIR, Thermo Scientific, USA). The specific surface area was calculated using the Brunauer-Emmett-Taylor (BET) method. The pore size distribution was calculated by Barrett-Joyner-Halenda (BJH) method. A confocal Raman microscope (Alpha300R, WITec GmbH, Germany) with a light source of 514 nm and an integration time of 1 s was used to obtain Raman spectra. The ATR-SEIRAS spectrum was obtained by the Nicolet iS50 Fourier transform infrared spectrometer with a built-in MCT-A detector. Electron spin resonance (ESR) was performed on Bruker EMX-plus.

## **3. Details for Electrochemical Measurements.**

### **3.1. 2e<sup>-</sup> ORR performance measurements**

Electrochemical experiments were conducted using an electrochemical workstation (CHI760E) at room temperature. The three-electrode system was constructed with an RRDE (RRDE-3A, ALS Co., Ltd) working electrode, Pt wire counter electrode, and saturated calomel electrode (SCE) reference electrode. The electrocatalyst ink was prepared by mixing 4 mg of

electrocatalyst, 900  $\mu\text{L}$  of absolute ethanol, 100  $\mu\text{L}$  of 0.5% Nafion, followed by ultrasonication for 45 min. 5  $\mu\text{L}$  of the electrocatalyst ink was pipetted and dropped onto the GC disk (0.1256  $\text{cm}^2$ ) and dried at Infrared lamp to obtain a target electrocatalyst loading of 39.8  $\mu\text{g}/\text{cm}^2$ .

The cyclic voltammetry (CV) of oxygen reduction reaction was conducted in  $\text{O}_2$ -saturated 0.1 M KOH with the potential range of 0-1.2 V (vs. RHE) and scan rate of 5 mV/s. The linear sweep voltammetry (LSV) of oxygen reduction reaction was measured in  $\text{O}_2$ -saturated 0.1 M KOH using RRDE and CHI760E at the rotation speed of 1600 rpm with the potential range of 0-1.2 V (vs. RHE) and scan rate of 5 mV/s. The  $\text{H}_2\text{O}_2$  produced on the disk electrode detected by the ring electrode which the potential fixed at 1.29 V (vs. RHE). The  $\text{H}_2\text{O}_2$  selectivity of the electrocatalysts was calculated the both disc and ring current using the following equations (1) and (2):

$$\text{H}_2\text{O}_2\% = 200 \times \frac{I_{\text{R}/\text{N}}}{I_{\text{D}} + I_{\text{R}/\text{N}}} \quad (1)$$

$$n = 4 \times \frac{I_{\text{D}}/\text{N}}{I_{\text{D}} + I_{\text{R}/\text{N}}} \quad (2)$$

where  $I_{\text{D}}$  was disk current,  $I_{\text{R}}$  was ring current, and N was current collection coefficient of the Pt ring. N was determined to be 0.4 in our system after calibration using the reversible  $[\text{Fe}(\text{CN})_6]^{4-}/^{3-}$  redox couple (+0.36 vs. SHE).

### 3.2. Collection Efficiency of RRDE measurements

Measure of the collection efficiency was performed on the blank RRDE (0.1256  $\text{cm}^2$  of GC disc area, 0.1884  $\text{cm}^2$  of Pt ring area). The Pt ring collection efficiency (N) was determined using the single-electron reversible redox ferrocyanide/ferricyanide system. Specifically, the electrolyte was prepared by dissolving 10 mM of potassium ferricyanide(III) ( $\text{K}_3[\text{Fe}(\text{CN})_6]$ , Macklin, 99%) in 0.1 M KOH. It is recommended to purify the electrolyte with Ar gas for at least 30 min prior to measurement in order to eliminate any dissolved  $\text{O}_2$  gas. Maintaining an atmosphere of Ar gas into electrolyte during measurements is essential in order to ensure accurate results.

RRDE voltammograms were recorded by performing LSV on the disk from 1.2  $V_{\text{RHE}}$  to 0  $V_{\text{RHE}}$  at 10 mV/s and different rotation rates (400, 625, 900, 1225, 1600, 2025 and 2500 rpm), meanwhile the ring was held at 1.30  $V_{\text{RHE}}$  (Figure. S9). The collection efficiency (N) of RRDE is calculated using the equation (3):

$$N = I_{\text{ring}}/I_{\text{disk}} \quad (3)$$

where  $I_{\text{ring}}$  and  $I_{\text{disk}}$  are the ring and the disk current, respectively. The ferrocyanide reduced on the disk electrode is sent to the Pt ring range due to diffusion, and the voltage applied on the Pt ring will oxidize the ferrocyanide to ferricyanide. The current generated is a reflection of the collection efficiency that a platinum ring can provide. When both ferricyanide reduction on the bare GC disk and ferrocyanide oxidation on the Pt ring became diffusion-limited, the  $N$  was found to be 0.4 and was independent of the RRDE rotation rate.

### 3.3. H<sub>2</sub>O<sub>2</sub> Faraday efficiency and production measurements

To assess the hydrogen peroxide output (yield), the working electrode employed the following method: the catalyst dispersion, containing a certain amount of Nafion solution, was directly sprayed onto a diffusion layer (Suzhou Saintly, YLS-30T). The entire assembly was used as the working electrode with the aim of obtaining a more pronounced current. The effective area of the experimental setup was 3 × 3 cm. The diffusion layer was cut into small pieces of 3 × 3 cm using scissors as the working area, and the catalyst dispersion was sprayed onto the diffusion layer to create the corresponding cathode. The anode electrode directly utilized commercially available stable metal oxide anode materials (MMO, IrO<sub>2</sub>/Ta<sub>2</sub>O<sub>5</sub>-Ti). The catalyst powder was combined with GDL carbon paper to form the cathode electrode.

During the yield test, the O<sub>2</sub> flow rate was maintained at 10 mL min<sup>-1</sup>, and the current was set at a fixed value. Every hour, 1 mL of cathode electrolyte was taken as the test sample. Additionally, 1 mL of H<sub>2</sub>SO<sub>4</sub> (0.5 M) and 1 mL of C<sub>4</sub>K<sub>2</sub>O<sub>9</sub>Ti (0.05 M) were mixed with the sample. Due to the formation of pro-oxidant, the solution rapidly turned yellow. The concentration of H<sub>2</sub>O<sub>2</sub> was ultimately determined through UV-vis technology ( $\lambda=400$  nm) and a pre-measured standard curve. Faradaic efficiency was calculated using Equation (4):

$$FE\% = \frac{2 \times C \times V \times F}{Q} \times 100\%$$

(4)

### 3.4. Electrochemical active surface area and tafel measurements

Electrochemical capacitance measurements were employed to quantify the electrochemical active surface area (ECSA) of catalysts. Scan rates ranging from 20 to 100 mV·s<sup>-1</sup> were utilized in order to assess the ECSA. Specially, plotting the cathodic current versus the scanning rate of a

double-layer capacitor yields a linear relationship following the ideal behavior of a capacitor. The electrochemical mass activity of the catalyst was calculated using equations (8) and (9).

$$C_{dl} = \frac{I_c}{\nu} \quad (5)$$

$$Rf(\text{Roughness factor}) = \frac{C_{dl}}{C_s} \quad (6)$$

$$ECSA = R_f \times A_{GCE} \quad (7)$$

$$MA = \frac{r_f j_k}{m} \quad (8)$$

$$r_f = \frac{A_{real}}{A_{geo}} \quad (9)$$

$I_c$  represents the average cathodic current, and  $C_{dl}$  denotes the double-layer capacitance. The symbol  $\nu$  represents the scan rate. The slope of this line can be utilized to determine  $C_{dl}$ . Linear fitting of the resulting curves can be employed to assess the specific capacitance of each catalyst. In addition, the specific capacitance ( $C_s$ ) of a flat surface is usually 20 - 60  $\mu F \text{ cm}^{-2}$ . We used 40  $\mu F \text{ cm}^{-2}$  in this work.  $A_{GCE}$  is the electrode surface area. In the equations (8) and (9),  $j_k$ : Kinetic current density;  $m$ : Catalyst loading density on the electrode,  $\text{mg}/\text{cm}^2$ ;  $R_f$ : Roughness factor;  $A_{real}$ : Real surface area of the catalyst, measured from the CV curve (ECSA);  $A_{geo}$ : Geometric surface area of the working electrode.

The kinetic current densities ( $j_k$ ) was obtained by Koutecky-Levich equation (10) and (11):

$$\frac{1}{J} = \frac{1}{J_L} + \frac{1}{J_K} = \frac{1}{B\omega^{1/2}} + \frac{1}{J_K} \quad (10)$$

$$B = 0.2nFC_0D_0^{2/3}V^{-1/6} \quad (11)$$

Where  $J$ ,  $J_K$  and  $J_L$  represents the measured current density, the kinetic and diffusion-limiting current densities,  $\omega$  is the angular velocity,  $C_0$  is the bulk concentration of  $O_2$  ( $1.2 \times 10^{-6} \text{ mol cm}^{-3}$ ),  $D_0$  is the diffusion coefficient of  $O_2$  in 0.1 M KOH and 0.5 M  $Na_2SO_4$  ( $1.9 \times 10^{-5} \text{ cm}^2 \text{ s}^{-1}$ ), and  $V$  is the kinematic viscosity of the electrolyte ( $0.01 \text{ cm}^2 \text{ s}^{-1}$ ), the number of electrons transferred ( $n$ ) was obtained by equation (2).

Calculated electrochemical active surface area.

In 0.5 M  $Na_2SO_4$  solution:

$$ECSA_{COF} = \frac{0.21 \text{ mF cm}^{-2}}{40 \mu F \text{ cm}^{-2} \text{ per cm}_{ECSA}^2} = 5.25 \text{ cm}_{ECSA}^2$$

$$ECSA_{SnO_2} = \frac{0.48 \text{ mF cm}^{-2}}{40 \mu\text{F cm}^{-2} \text{ per cm}_{ECSA}^2} = 12.00 \text{ cm}_{ECSA}^2$$

$$ECSA_{5\%SnO_2/COF} = \frac{0.49 \text{ mF cm}^{-2}}{40 \mu\text{F cm}^{-2} \text{ per cm}_{ECSA}^2} = 12.25 \text{ cm}_{ECSA}^2$$

$$ECSA_{10\%SnO_2/COF} = \frac{0.66 \text{ mF cm}^{-2}}{40 \mu\text{F cm}^{-2} \text{ per cm}_{ECSA}^2} = 16.50 \text{ cm}_{ECSA}^2$$

$$ECSA_{15\%SnO_2/COF} = \frac{0.53 \text{ mF cm}^{-2}}{40 \mu\text{F cm}^{-2} \text{ per cm}_{ECSA}^2} = 13.25 \text{ cm}_{ECSA}^2$$

In 1 M KOH solution:

$$ECSA_{COF} = \frac{0.28 \text{ mF cm}^{-2}}{40 \mu\text{F cm}^{-2} \text{ per cm}_{ECSA}^2} = 7.00 \text{ cm}_{ECSA}^2$$

$$ECSA_{SnO_2} = \frac{0.48 \text{ mF cm}^{-2}}{40 \mu\text{F cm}^{-2} \text{ per cm}_{ECSA}^2} = 12.00 \text{ cm}_{ECSA}^2$$

$$ECSA_{5\%SnO_2/COF} = \frac{0.41 \text{ mF cm}^{-2}}{40 \mu\text{F cm}^{-2} \text{ per cm}_{ECSA}^2} = 10.25 \text{ cm}_{ECSA}^2$$

$$ECSA_{10\%SnO_2/COF} = \frac{0.61 \text{ mF cm}^{-2}}{40 \mu\text{F cm}^{-2} \text{ per cm}_{ECSA}^2} = 15.25 \text{ cm}_{ECSA}^2$$

$$ECSA_{15\%SnO_2/COF} = \frac{0.43 \text{ mF cm}^{-2}}{40 \mu\text{F cm}^{-2} \text{ per cm}_{ECSA}^2} = 10.75 \text{ cm}_{ECSA}^2$$

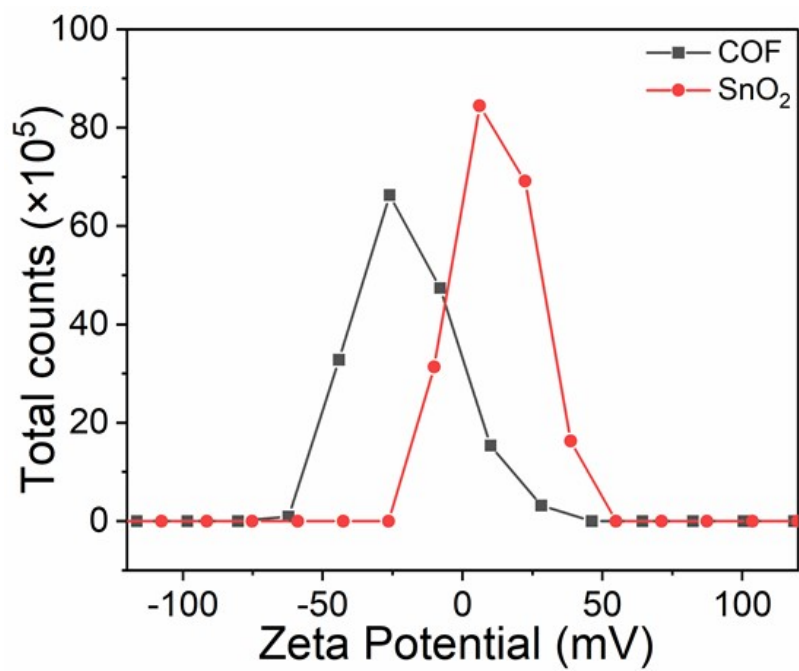

Figure S1. Zeta potentials of SnO<sub>2</sub> and COF (pH = 2).



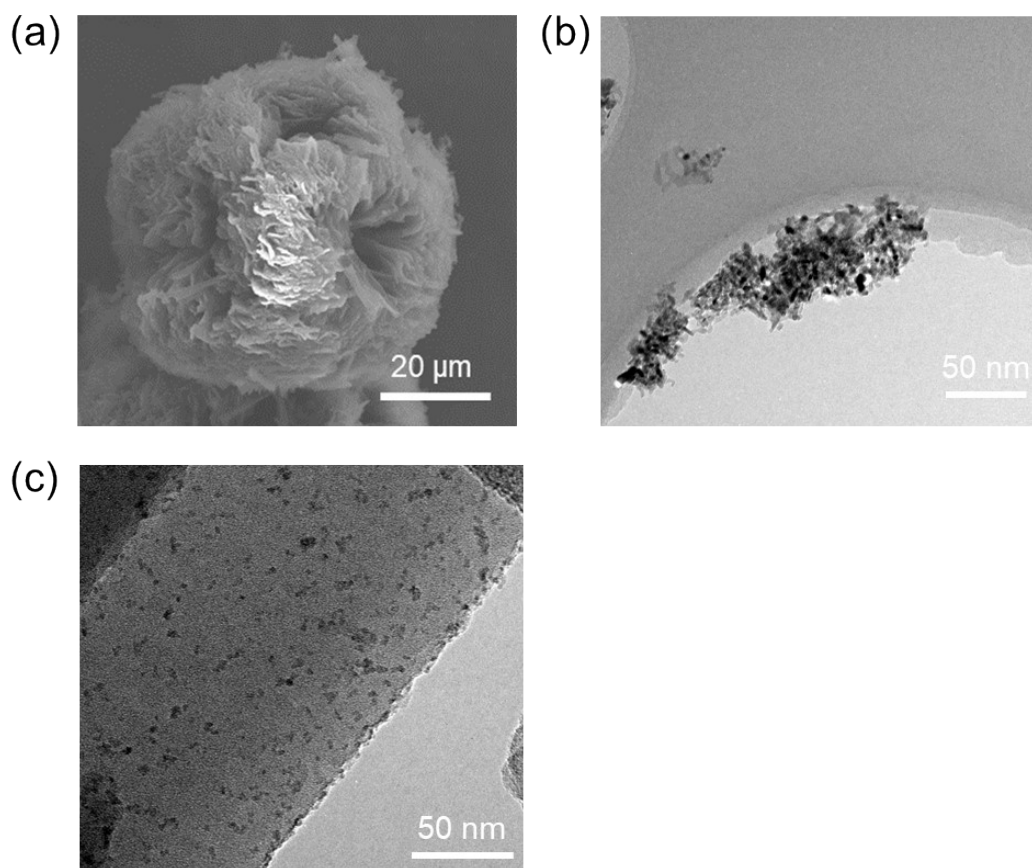

Figure S2. (a) The SEM image of COF, The TEM image of (b) SnO<sub>2</sub> nanoparticles and (c) 10%SnO<sub>2</sub>/COF

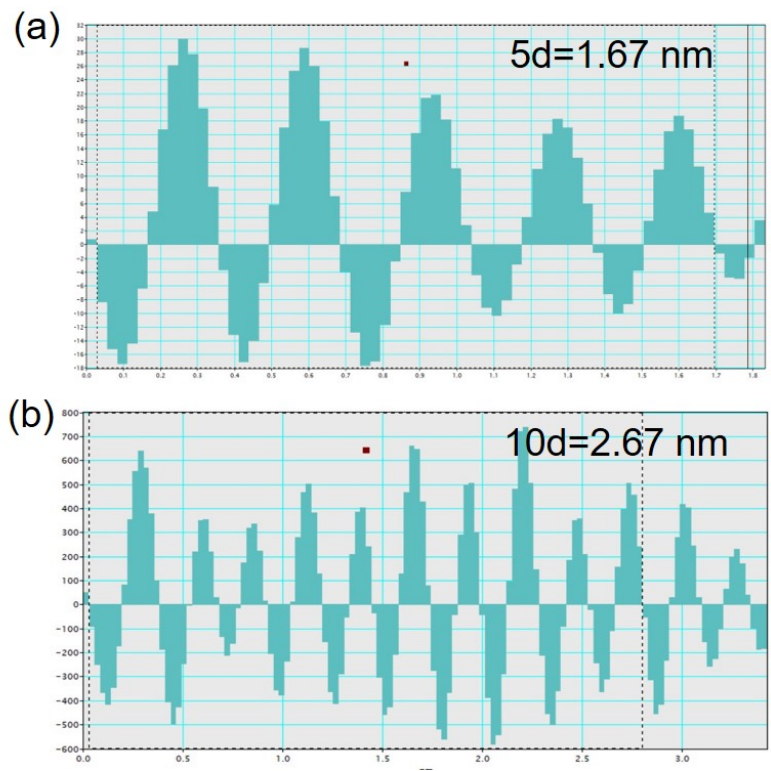

Figure S3. The details about the measurement of lattice fringes belong to (a) SnO<sub>2</sub> (110) and (b) SnO<sub>2</sub> (101).

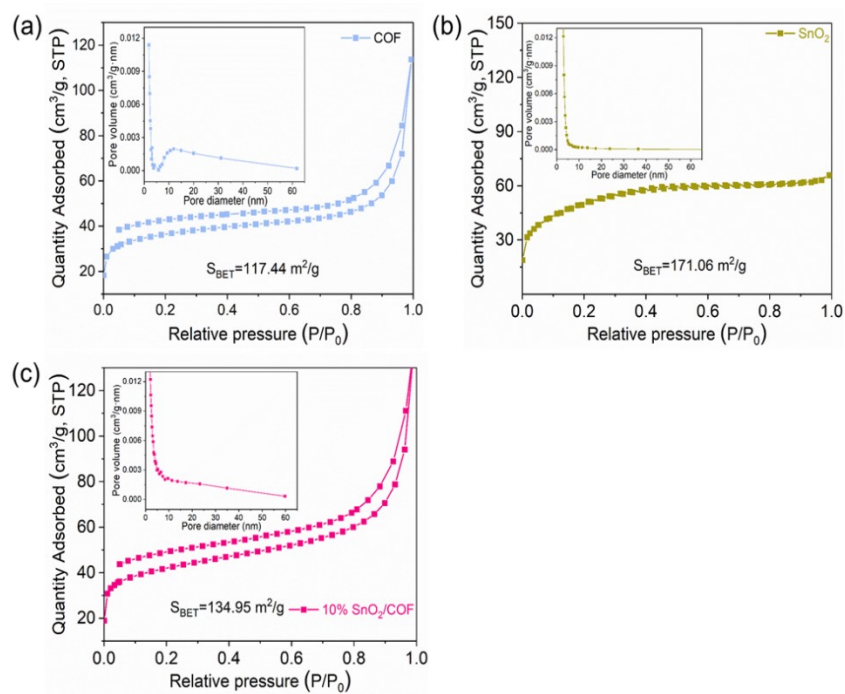

Figure S4.  $N_2$  adsorption-desorption isotherms of (a) COF, (b)  $SnO_2$  and (c) 10%  $SnO_2/COF$ . The inset shows the pore volume.

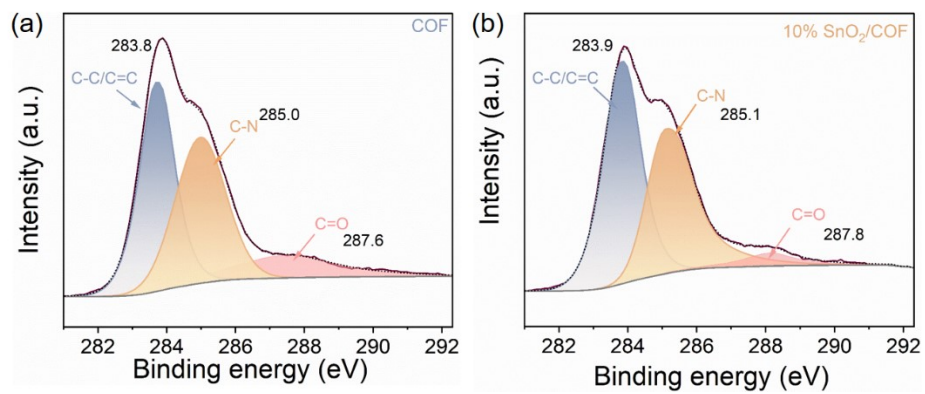

Figure S5. C 1s XPS spectra of (a) COF and (b) 10%SnO<sub>2</sub>/COF.

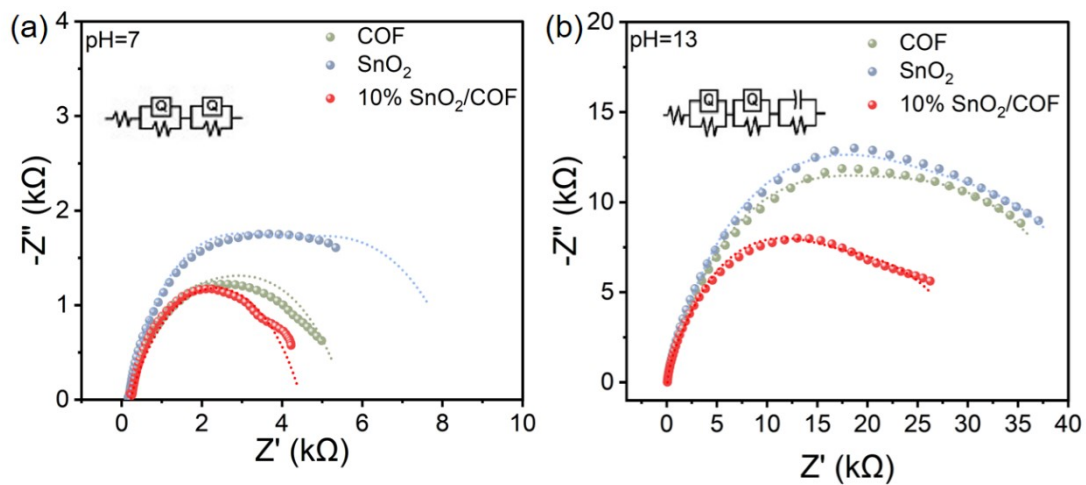

Figure S6. EIS Nyquist plots and fitting results of COF,  $\text{SnO}_2$  and 10%  $\text{SnO}_2/\text{COF}$  at (a) 0.5 M  $\text{Na}_2\text{SO}_4$  solution (pH=7) and (b) 0.1 M KOH solution (pH=13).

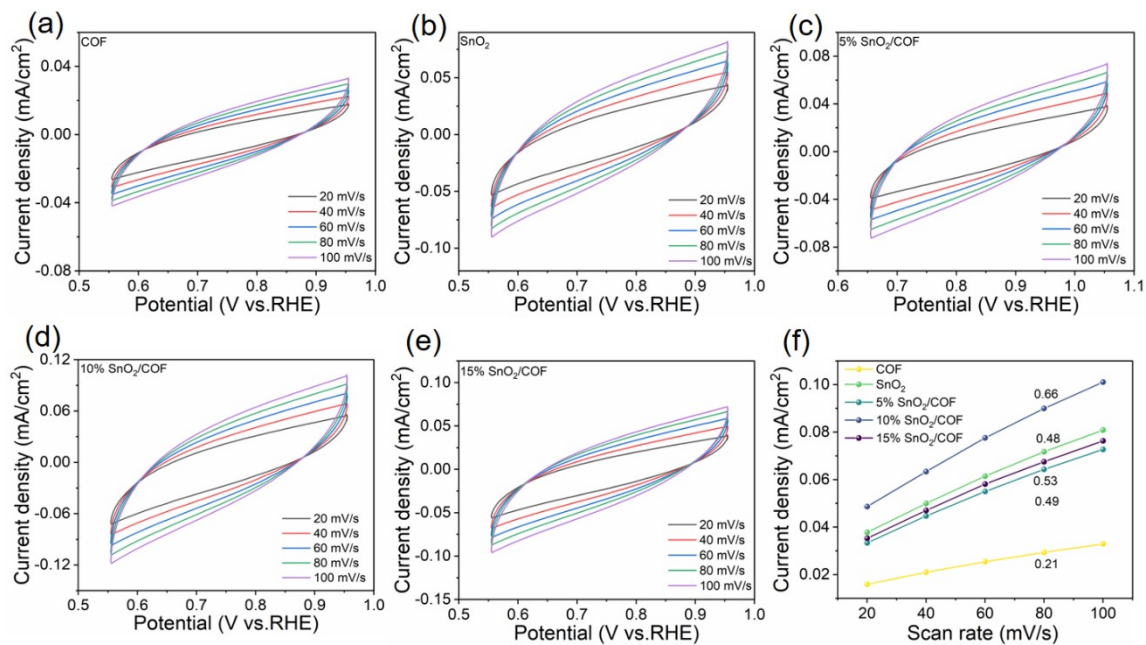

Figure S7. CV curves in 0.5 M Na<sub>2</sub>SO<sub>4</sub> solution (pH=7) of (a) COF, (b) SnO<sub>2</sub>, (c) 5% SnO<sub>2</sub>/COF, (d) 10% SnO<sub>2</sub>/COF, (e) 15% SnO<sub>2</sub>/COF with various scan rates for 2e<sup>-</sup> ORR; (f) Capacitive currents as a function of scan rates with various rates from 20 to 100 mV/s of various catalysis.

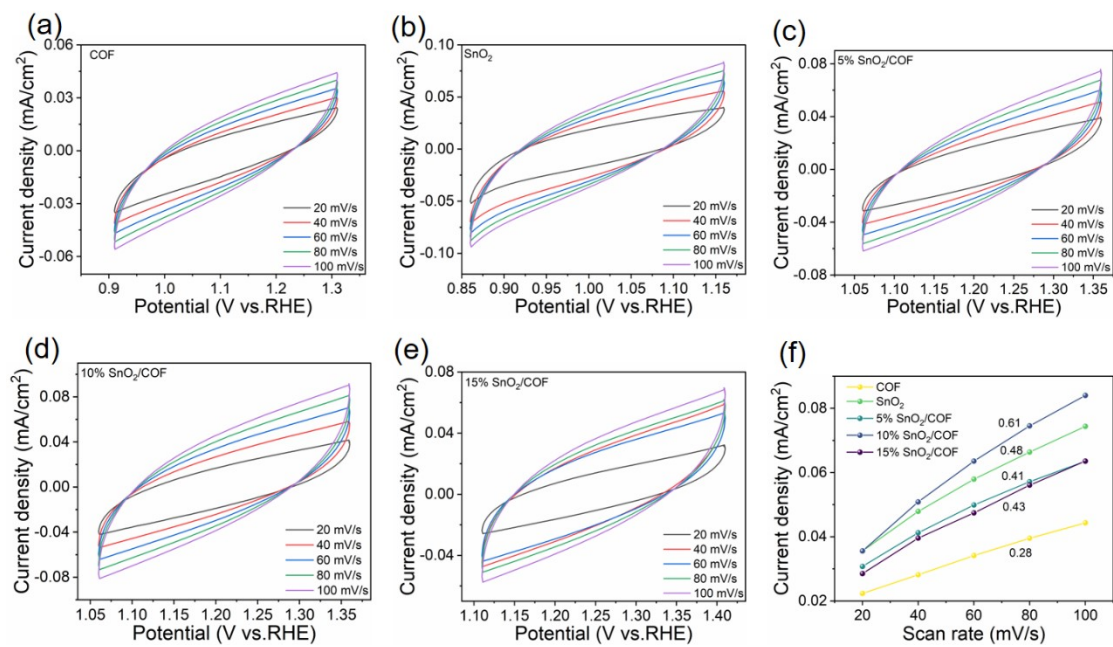

Figure S8. CV curves in 0.1 M KOH solution (pH=13) of (a) COF, (b) SnO<sub>2</sub>, (c) 5% SnO<sub>2</sub>/COF, (d) 10% SnO<sub>2</sub>/COF, (e) 15% SnO<sub>2</sub>/COF with various scan rates for 2e<sup>-</sup> ORR; (f) Capacitive currents as a function of scan rates with various rates from 20 to 100 mV/s of various catalysts.

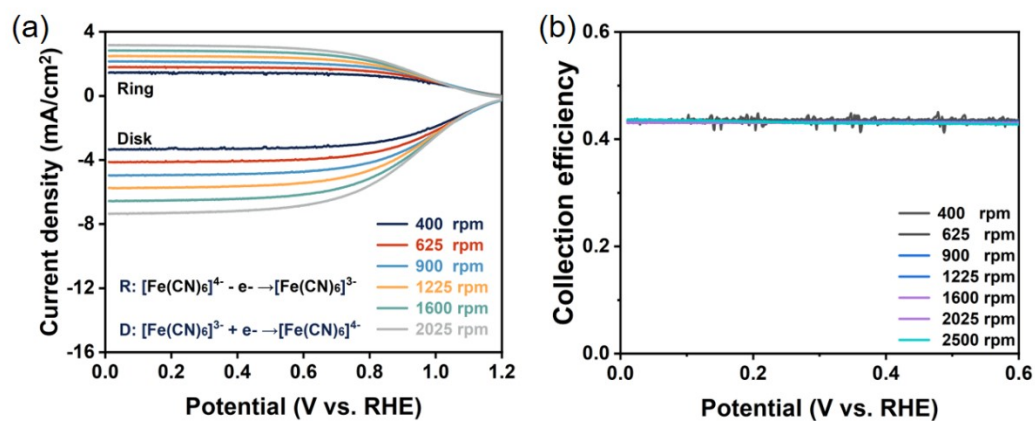

Figure S9. (a) LSV at different rotating speeds. (b) the corresponding collection efficiency of RRDE voltammograms as a function of the potential.



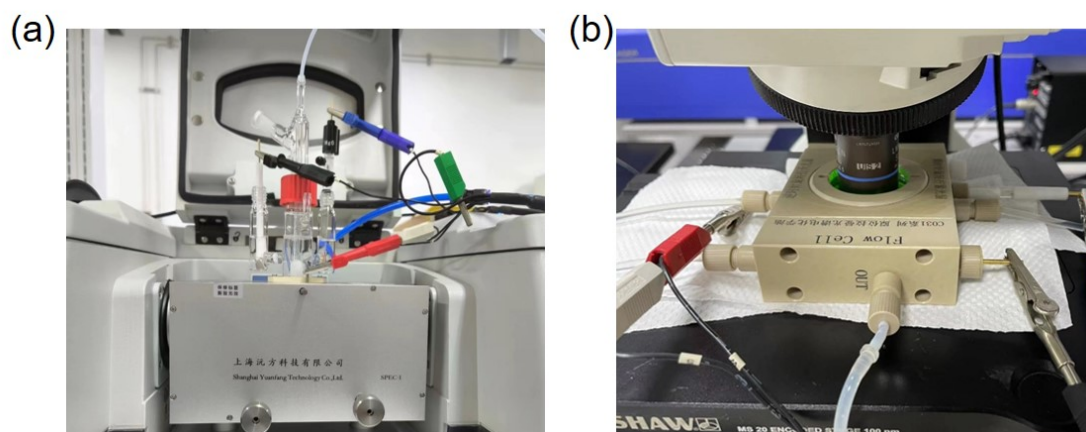

Figure S10. (a) Diagram of devices placement during in-situ Raman measurement ; (b) Diagram of devices placement during in-situ ATR-SEIRAS.

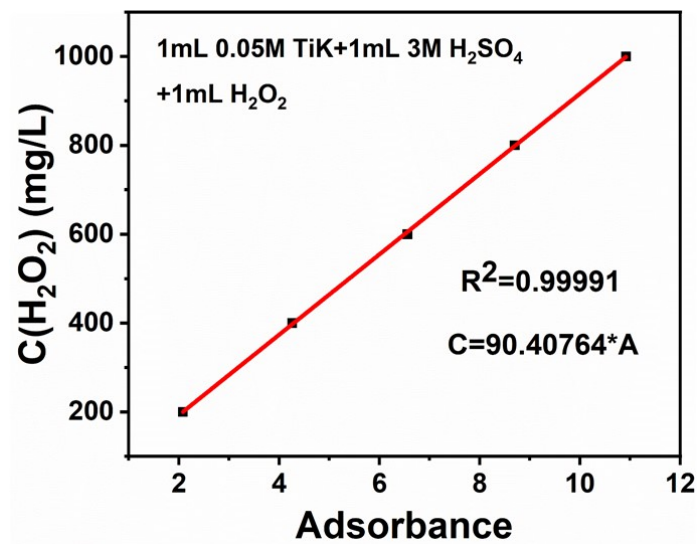

Figure S11. H<sub>2</sub>O<sub>2</sub> concentration-absorbance standard curve.

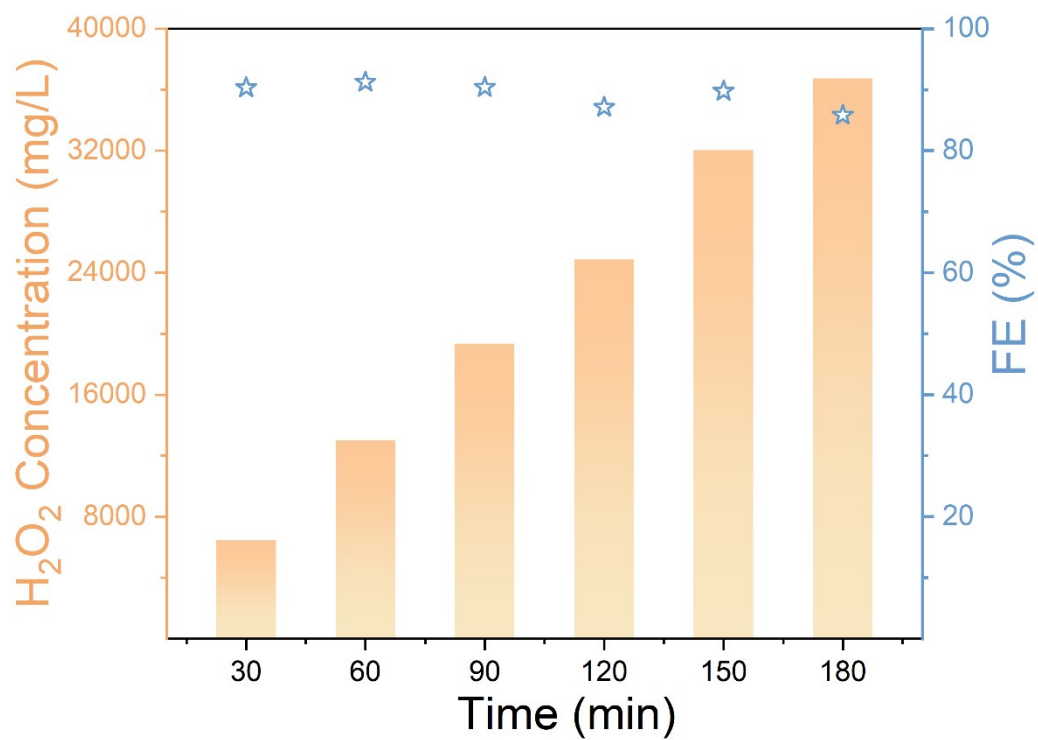

Figure S12. Time depending H<sub>2</sub>O<sub>2</sub> concentration and FE in 0.1 M KOH solution with flow-cell.

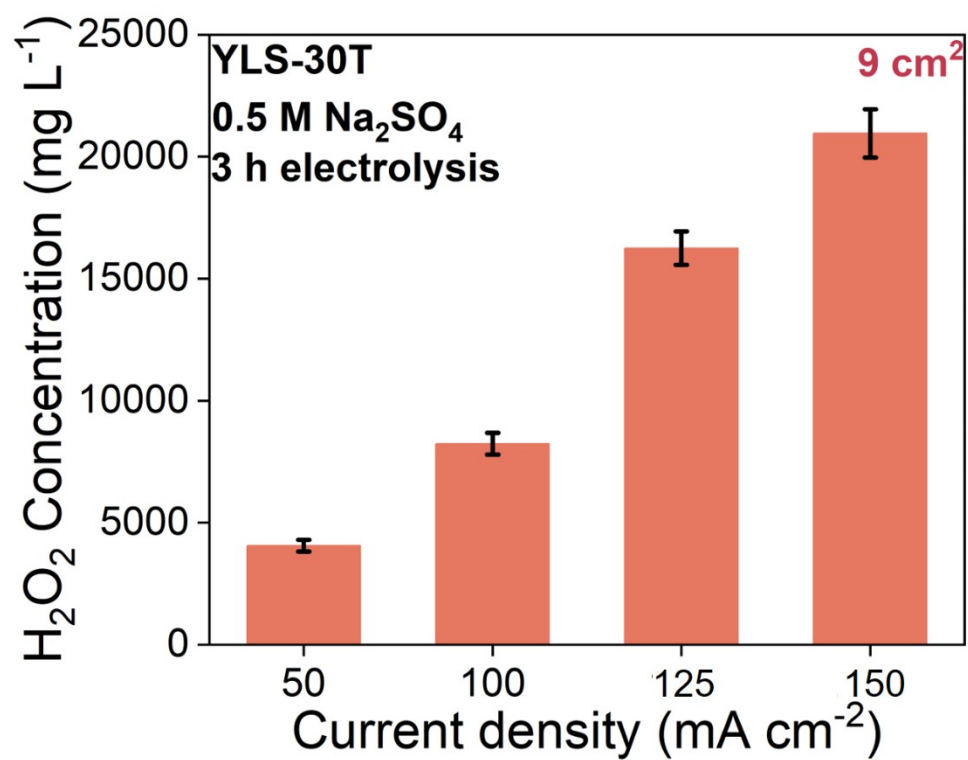

Figure S13. H<sub>2</sub>O<sub>2</sub> concentration of carbon paper at different current densities (50, 100, 150, and 200 mA/cm<sup>2</sup>) in 0.5 M Na<sub>2</sub>SO<sub>4</sub> solution with flow-cell.

| Catalysts                  | H <sub>2</sub> O <sub>2</sub> selectivity (%) <sup>*</sup> | H <sub>2</sub> O <sub>2</sub> yield (mmol g <sup>-1</sup> h <sup>-1</sup> ) | FE (%) <sup>#</sup> | Electrolyzer     | H <sub>2</sub> O <sub>2</sub> concentration (wt.%) | Refs.            |
|----------------------------|------------------------------------------------------------|-----------------------------------------------------------------------------|---------------------|------------------|----------------------------------------------------|------------------|
| <b>SnO<sub>2</sub>/COF</b> | <b>95.8</b>                                                | <b>19607</b>                                                                | <b>85</b>           | <b>Flow Cell</b> | <b>3.5 (3 h)</b>                                   | <b>This work</b> |
| ZnO-v                      | 98.4                                                       | 3658                                                                        | 98.1                | Flow Cell        | /                                                  | 3                |
| Co SACs                    | 95.6                                                       | 4500                                                                        | 95                  | Flow Cell        | /                                                  | 4                |
| h-SnO <sub>2</sub>         | 99.99                                                      | 3885.26                                                                     | /                   | Flow Cell        | 0.0011 (20 h)                                      | 5                |
| a-PdSe <sub>2</sub> NPs/C  | 90                                                         | 2242.1                                                                      | /                   | Flow Cell        | 0.1 (2 h)                                          | 6                |
| PtP <sub>2</sub> NCs       | 98.5                                                       | 2825                                                                        | 78.8                | PEMFC            | 3 (65 h)                                           | 7                |
| In SAs/NSBC                | 95                                                         | 6710                                                                        | 80                  | PEMFC            | /                                                  | 8                |

<sup>\*</sup>The data are from RRDE setup. <sup>#</sup>The data are obtained from electrolyzer.

Table S1. Comparative analysis of state-of-the-art metal-based electrocatalysis for 2e<sup>-</sup> ORR H<sub>2</sub>O<sub>2</sub> production in neutral electrolyte.

| Catalysts                  | H <sub>2</sub> O <sub>2</sub> selectivity (%) <sup>*</sup> | H <sub>2</sub> O <sub>2</sub> yield (mmol g <sup>-1</sup> h <sup>-1</sup> ) | FE (%) <sup>#</sup> | Electrolyzer     | H <sub>2</sub> O <sub>2</sub> concentration (wt.%) | Refs.            |
|----------------------------|------------------------------------------------------------|-----------------------------------------------------------------------------|---------------------|------------------|----------------------------------------------------|------------------|
| <b>SnO<sub>2</sub>/COF</b> | <b>98.5</b>                                                | <b>20016</b>                                                                | <b>85.8</b>         | <b>Flow Cell</b> | <b>3.5 (3 h)</b>                                   | <b>This work</b> |
| Fe <sub>SA-NS/C-700</sub>  | 92                                                         | 4950                                                                        | 91.4                | Flow Cell        | 5.8 (30 h)                                         | 9                |
| Co-N-C                     | 80                                                         | 4330                                                                        | 52                  | Flow Cell        | /                                                  | 10               |
| Ni/C-4                     | 95                                                         | 906                                                                         | 95                  | Flow Cell        | 0.051 (100 h)                                      | 11               |
| CSH-600                    | 96                                                         | 0.6924                                                                      | 93.1                | Flow Cell        | /                                                  | 12               |
| Co-SCD-2                   | 95.2                                                       | 26780                                                                       | 85                  | Flow Cell        | /                                                  | 13               |
| ZnCo-ZIFs                  | 99                                                         | 4350                                                                        | 95                  | Flow Cell        | 2.7 (2 h)                                          | 14               |
| CoPc-OCNT                  | 99                                                         | 11527                                                                       | 91                  | Flow Cell        | 3.7 (l)                                            | 15               |
| Mn-NO-C <sub>H</sub>       | 98.5                                                       | 15100                                                                       | ~100                | Flow Cell        | 4.84 (50 h)                                        | 16               |

<sup>\*</sup>The data from RRDE setup. <sup>#</sup>The data from electrolyzer.

Table S2. Comparative analysis of state-of-the-art metal-based electrocatalysis for 2e<sup>-</sup> ORR H<sub>2</sub>O<sub>2</sub> production in basic electrolyte.

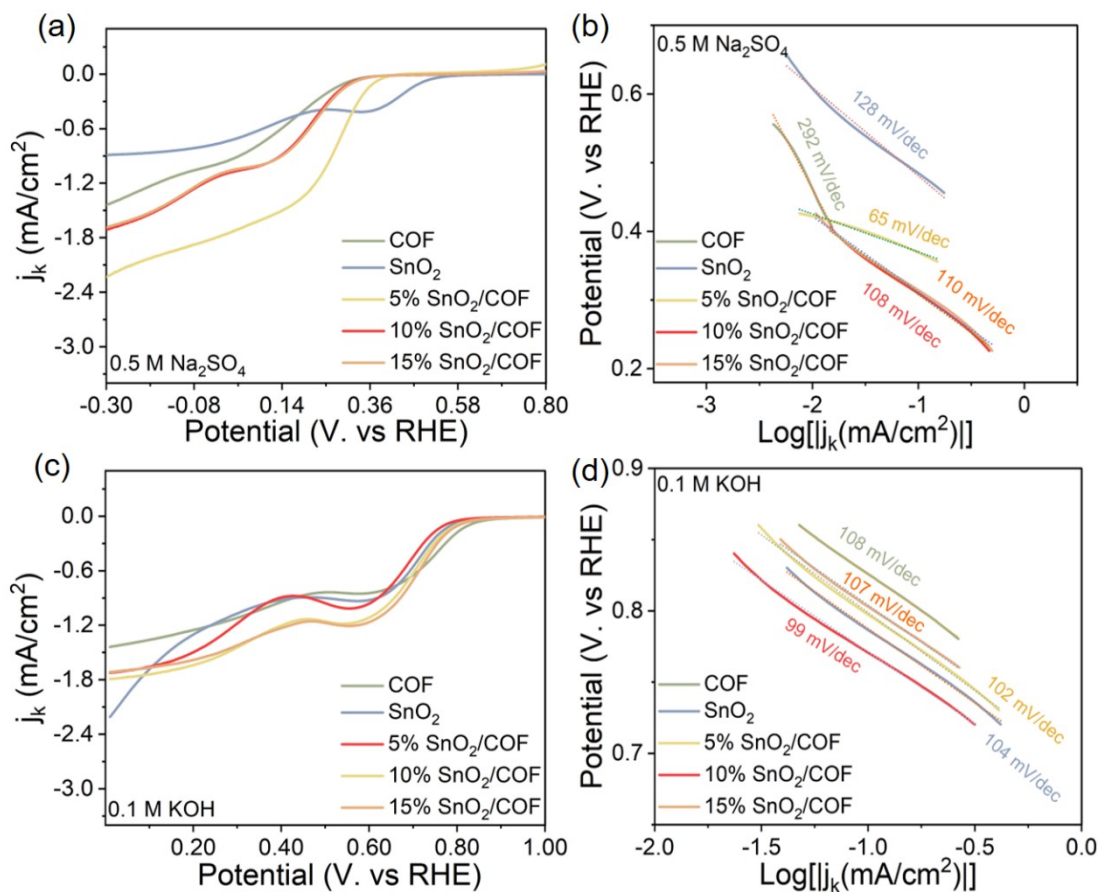

Figure S14. The kinetic current densities of different electrocatalyst in (a)  $0.5 \text{ M Na}_2\text{SO}_4$  and (c)  $0.1 \text{ M KOH}$ .  
The tafel slopes for different electrocatalyst in (b)  $0.5 \text{ M Na}_2\text{SO}_4$  and (d)  $0.1 \text{ M KOH}$ .

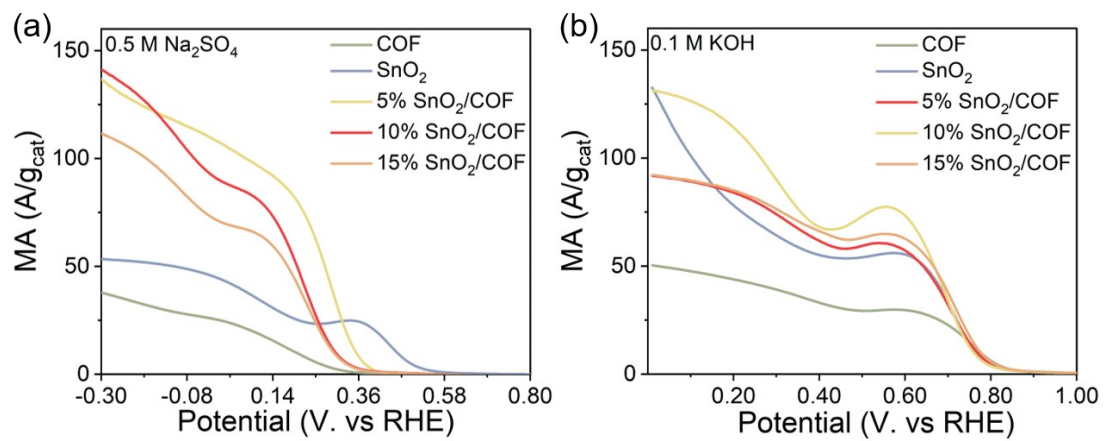

Figure S15. The mass activity of different electrocatalyst in (a) 0.5 M Na<sub>2</sub>SO<sub>4</sub> and (b) .0.1 M KOH.



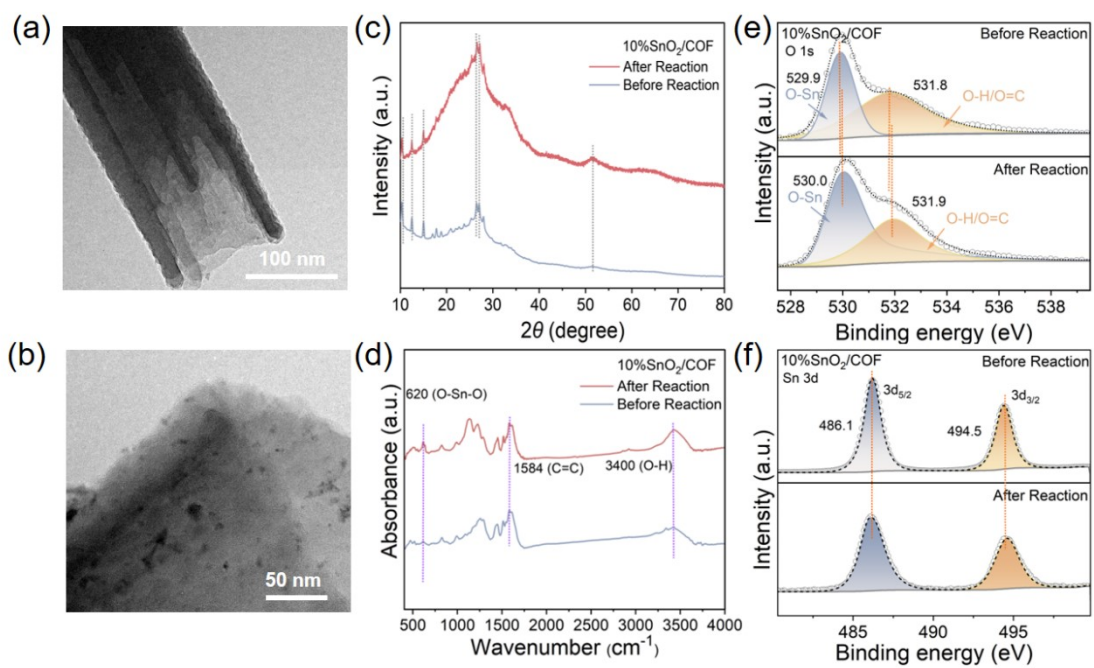

Figure S16. (a,b) TEM images of the catalyst after 20 cycles; (c) XRD, (d) FT-IR, (e) O 1s, and (f) Sn 3d spectra before and after 20 cycles.

## Reference

1. M. Ahamed, M. J. Akhtar, M. A. M. Khan and H. A. Alhadlaq, *Int J Nanomedicine*, 2021, **16**, 89-104.
2. Y. Shi, S. Liu, Z. Zhang, Y. Liu and M. Pang, *Chemical Communications*, 2019, **55**, 14315-14318.
3. S. Ding, Y. Zhang, F. Lou, M. Li, Q. Huang, K. Yang, B. Xia, C. Tang, J. Duan, M. Antonietti and S. Chen, *Materials Today Energy*, 2023, **38**, 101430.
4. Q. Zhao, Y. Wang, W. H. Lai, F. Xiao, Y. Lyu, C. Liao and M. Shao, *Energy & Environmental Science*, 2021, **14**, 5444-5456.
5. Y. Zhang, M. Wang, W. Zhu, M. Fang, M. Ma, F. Liao, H. Yang, T. Cheng, C.-W. Pao, Y.-C. Chang, Z. Hu, Q. Shao, M. Shao and Z. Kang, *Angew. Chem., Int. Ed.*, 2023, **62**, e202218924.
6. Z. Yu, S. Lv, Q. Yao, N. Fang, Y. Xu, Q. Shao, C.-W. Pao, J.-F. Lee, G. Li, L. Yang and X. Huang, *Advanced Materials*, 2022, **35**, 2208101.
7. H. Li, P. Wen, D. S. Itanze, Z. D. Hood, S. Adhikari, C. Lu, X. Ma, C. Dun, L. Jiang, D. L. Carroll, Y. Qiu and S. M. Geyer, *Nature Communications*, 2020, **11**, 3928.
8. E. Zhang, L. Tao, J. An, J. Zhang, L. Meng, X. Zheng, Y. Wang, N. Li, S. Du, J. Zhang, D. Wang and Y. Li, *Angewandte Chemie International Edition*, 2022, **61**, e202117347.
9. Y. Li, J. Chen, Y. Ji, Z. Zhao, W. Cui, X. Sang, Y. Cheng, B. Yang, Z. Li, Q. Zhang, L. Lei, Z. Wen, L. Dai and Y. Hou, *Angewandte Chemie International Edition*, 2023, **62**, e202306491.
10. Y. Sun, L. Silvioli, N. R. Sakhraie, W. Ju, J. Li, A. Zitolo, S. Li, A. Bagger, L. Arnarson and X. Wang, *Journal of the American Chemical Society*, 2019, **141**, 12372-12381.
11. H. Shen, L. Pan, T. Thomas, J. Wang, X. Guo, Y. Zhu, K. Luo, S. Du, H. Guo and G. J. Hutchings, *Cell Reports Physical Science*, 2020, **1**.
12. G. Wei, Y. Li, X. Liu, J. Huang, M. Liu, D. Luan, S. Gao and X. W. Lou, *Angewandte Chemie*, 2023, **135**, e202313914.
13. D. Qi, J. Xu, Y. Zhou, H. Zhang, J. Shi, K. He, Y. Yuan, J. Luo, S. Wang and Y. Wang, *Angewandte Chemie*, 2023, **135**, e202307355.
14. C. Zhang, L. Yuan, C. Liu, Z. Li, Y. Zou, X. Zhang, Y. Zhang, Z. Zhang, G. Wei and C. Yu, *Journal of the American Chemical Society*, 2023, **145**, 7791-7799.
15. P. Cao, X. Quan, X. Nie, K. Zhao, Y. Liu, S. Chen, H. Yu and J. G. Chen, *Nature Communications*, 2023, **14**, 172.
16. L. Y. Dong, J. S. Wang, T. Y. Li, T. Wu, X. Hu, Y. T. Wu, M. Y. Zhu, G. P. Hao and A. H. Lu, *Angewandte Chemie International Edition*, 2024, **63**, e202317660.
